# Supplementary material
Source: publisher figshare collection journal article supplement (https://acs.figshare.com/ndownloader/files/3858181)
Supplement: Supplementary file 1 [file 3858181]

## Supporting Information for

Optimizing  $\text{LiFePO}_4@\text{C}$  core-shell structures via the 3-Aminophenol-Formaldehyde  
polymerization for improved battery performance

Zi-xiang Chi <sup>[a]</sup>, Wei Zhang <sup>[a]</sup>, Xu-sheng Wang <sup>[b]</sup>, Fu-quan Cheng <sup>[b]</sup>, Ji-tao Chen <sup>[b]</sup>,

An-min Cao\* <sup>[a]</sup>, Li-jun Wan\* <sup>[a]</sup>

E-mail address: [anmin\\_cao@iccas.ac.cn](mailto:anmin_cao@iccas.ac.cn), [wanlijun@iccas.ac.cn](mailto:wanlijun@iccas.ac.cn)

<sup>a</sup> *Key Laboratory of Molecular Nanostructure and Nanotechnology and Beijing National  
Laboratory for Molecular Sciences, Institute of Chemistry, Chinese Academy of Sciences (CAS),  
Beijing 100190, PR China*

<sup>b</sup> *College of Chemistry and Molecular Engineering, Peking University, Beijing 100871, PR China*

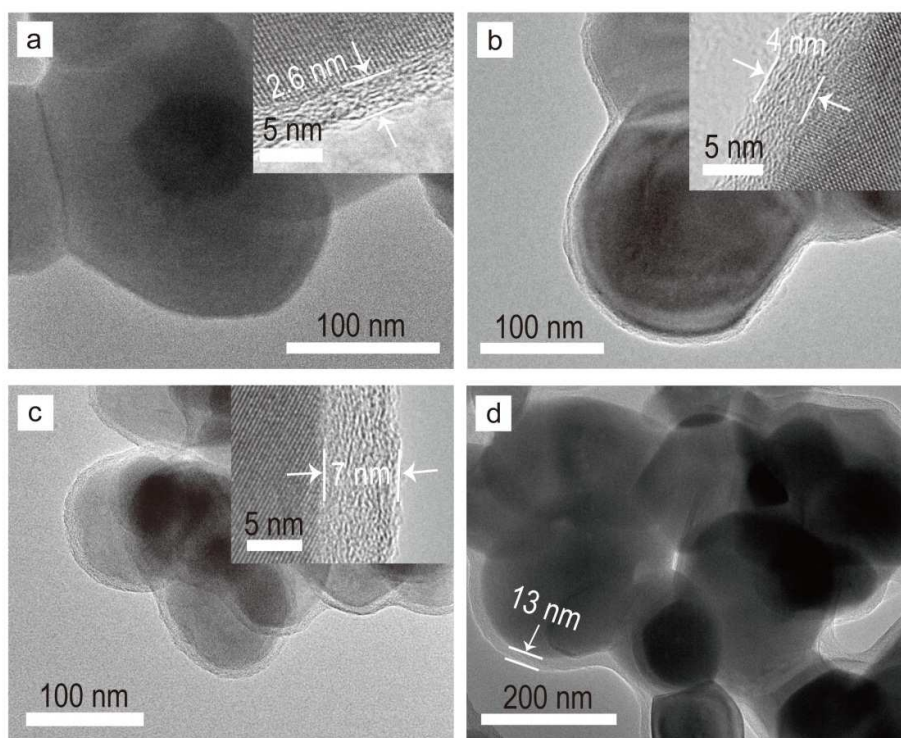

Figure S1 LFP@C samples with coating thickness of 2.6, 4, 7 and 13 nm, prepared by controlling

the reaction time for 1 h, 3 h, 6 h and 16 h respectively in the synthesis of LFP@C4.

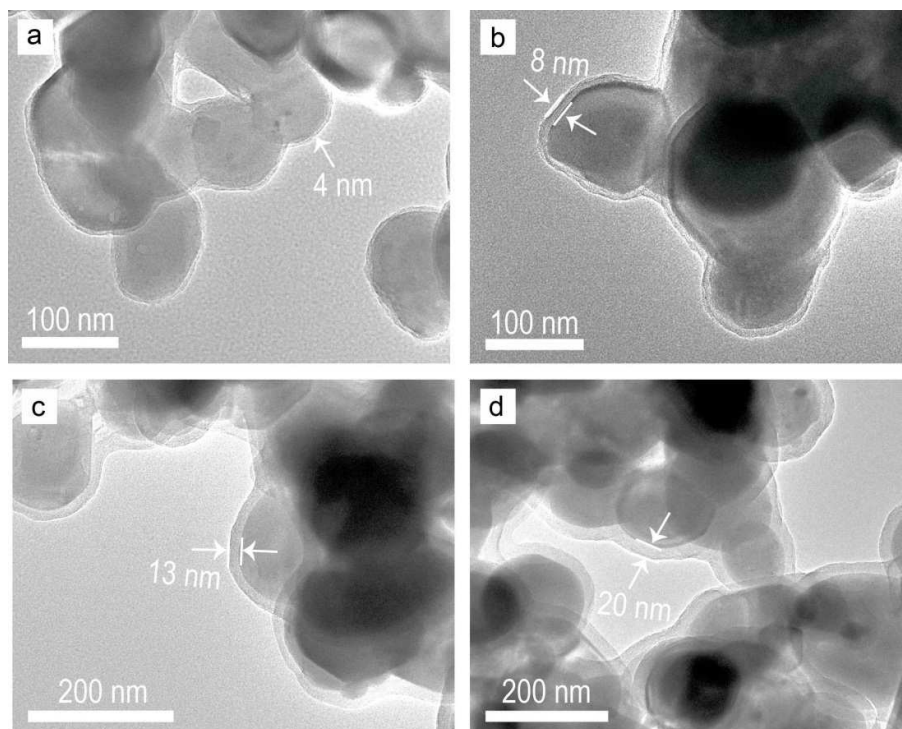

Figure S2 TEM images of samples before calcination: (a) LFP@3-AF1, (b)LFP@3-AF2, (c) LFP@3-AF3, and (d) LFP@3-AF4. The surface 3-AF layers are around 4 nm, 8 nm, 13 nm, and 20 nm in thickness, respectively.

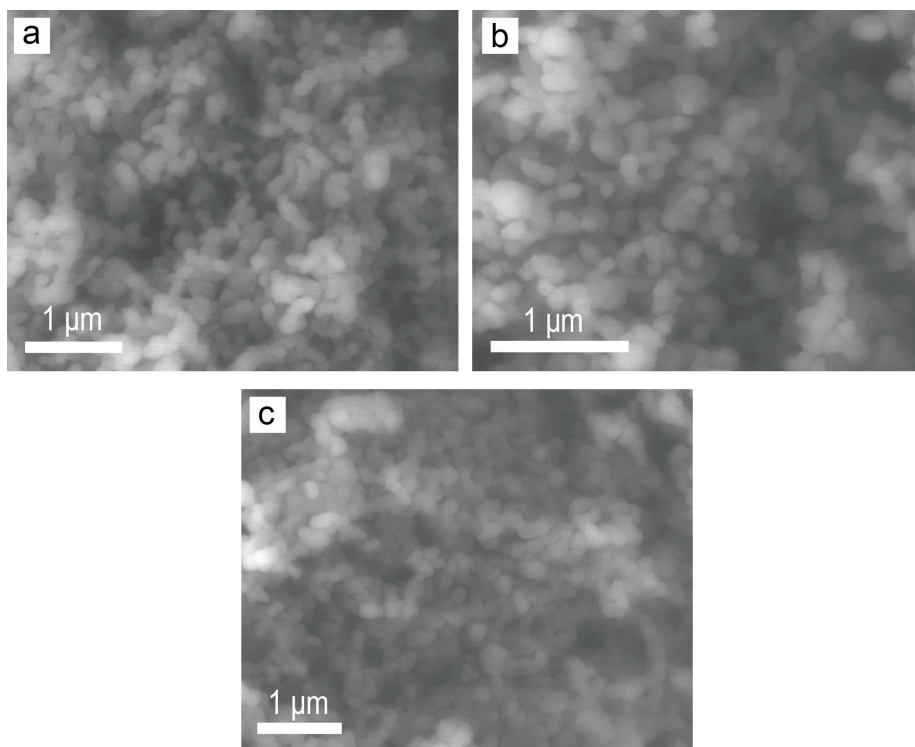

Figure S3 SEM images of the hydrothermally synthesized LFP (a), LFP@3-AF (b) and LFP@C

(c).

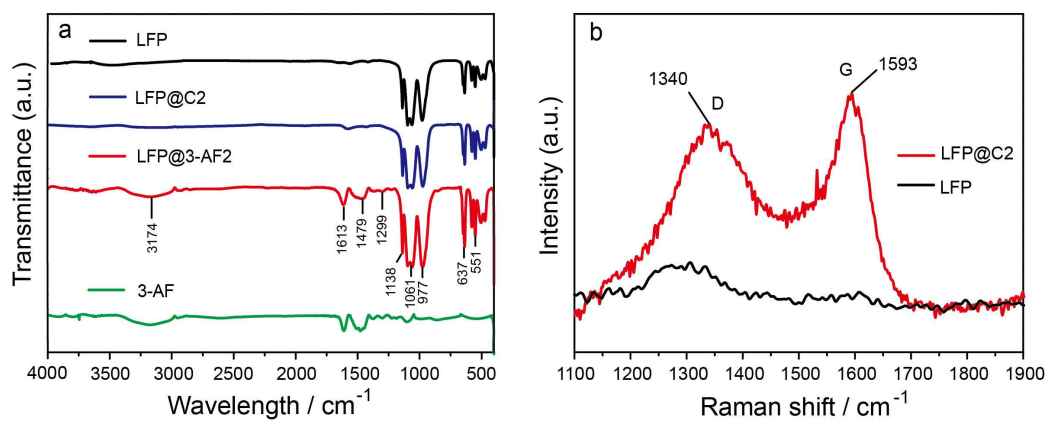

Figure S4 (a) IR spectra of LFP, LFP@C2, LFP@3-AF2 and 3-AF; (b) Representative Raman spectra of carbon coated LFP@C sample with a thickness of 5 nm.

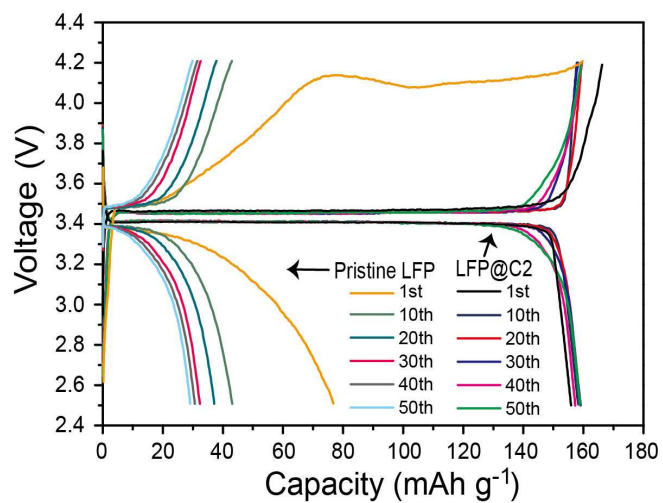

Figure S5 Comparison of voltage profiles between LFP and LFP@C2 in 50 cycles.

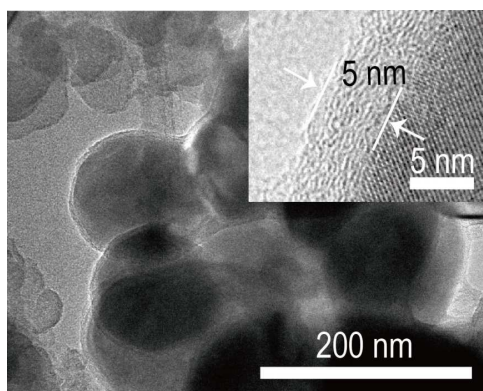

Figure S6 TEM image of LFP@C2 after charge-discharge cycling. No shedding of carbon layer is detectable and the thickness remains around 5 nm for LFP@C2, indicating the core-shell structured samples are pretty stable during cycling.
